# Supplementary material for: Phylogeny and Mycotoxin Characterization of Alternaria Species Isolated from Wheat Grown in Tuscany, Italy
Source: PubMed Central journal article supplement (PMC6267338; doi:10.3390/toxins10110472), 2018-11-14
Supplement: toxins-10-00472-s001.pdf [file toxins-10-00472-s001.pdf]

## Supplementary Materials: Phylogeny and Mycotoxin Characterization of *Alternaria* Species Isolated from Wheat Grown in Tuscany, Italy

Francesca A. Ramires, Mario Masiello, Stefania Somma, Alessandra Villani, Antonia Susca, Antonio F. Logrieco, Carlos Luz, Giuseppe Meca and Antonio Moretti

**Table S1.** Mean value and range of fungal contamination detected in the 100 wheat samples collected throughout the Tuscany region over four consecutive crop seasons (2013–2016).

| Host        | Year | Number of Fields | Fungal Contamination (%) |            |                      |            |                          |            |                       |            |                         |            |                     |            |
|-------------|------|------------------|--------------------------|------------|----------------------|------------|--------------------------|------------|-----------------------|------------|-------------------------|------------|---------------------|------------|
|             |      |                  | <i>Alternaria</i> spp.   |            | <i>Fusarium</i> spp. |            | <i>Cladosporium</i> spp. |            | <i>Epicoccum</i> spp. |            | <i>Stemphylium</i> spp. |            | Other Fungal Genera |            |
|             |      |                  | Range                    | Mean Value | Range                | Mean Value | Range                    | Mean Value | Range                 | Mean Value | Range                   | Mean Value | Range               | Mean Value |
| Soft Wheat  | 2013 | 10               | 0–31                     | 17         | 0–1                  | 0.3        | 12–26                    | 19         | 1–26                  | 16         | 10–21                   | 15         | 10–81               | 24         |
|             | 2014 | 16               | 0–17                     | 4          | 0–9                  | 2          | 6–33                     | 18         | 3–31                  | 16         | 6–22                    | 16         | 4–34                | 21         |
|             | 2015 | 11               | 4–73                     | 26         | 0–3                  | 1          | 6–31                     | 17         | 5–21                  | 16         | 1–21                    | 11         | 3–33                | 13         |
|             | 2016 | 11               | 11–50                    | 33         | 0–7                  | 3          | 9–33                     | 16         | 10–24                 | 16         | 5–15                    | 10         | 0–72                | 21         |
| Durum Wheat | 2013 | 31               | 0–48                     | 17         | 0–14                 | 3          | 0–22                     | 13         | 0–22                  | 14         | 0–18                    | 11         | 0–33                | 15         |
|             | 2014 | 15               | 0–11                     | 7          | 0–2                  | 0.3        | 11–35                    | 23         | 10–26                 | 17         | 10–37                   | 24         | 2–25                | 13         |
|             | 2015 | 4                | 8–43                     | 26         | 0–6                  | 3          | 10–29                    | 16         | 10–29                 | 22         | 10–20                   | 16         | 2–15                | 8          |
|             | 2016 | 2                | 22–35                    | 29         | 3–13                 | 6          | 10–32                    | 21         | 9–15                  | 11         | 4–26                    | 18         | 4–13                | 9          |

**Table S2.** Phylogenetic clades reported in Figure 1 of the 134 strains identified using multilocus sequence approach, isolated from 100 wheat samples collected throughout the Tuscany region over four consecutive crop seasons (2013–2016).

| Years of Sampling | Host        | Strains | Clade                                                                                                                                                                   |                              |                                                                                                         |                                                                         |                   |
|-------------------|-------------|---------|-------------------------------------------------------------------------------------------------------------------------------------------------------------------------|------------------------------|---------------------------------------------------------------------------------------------------------|-------------------------------------------------------------------------|-------------------|
|                   |             |         | A1                                                                                                                                                                      | A2                           | A5                                                                                                      | D                                                                       | E                 |
| 2013              | Soft wheat  | 13      | 17,876; 17,880; 17,881; 17,890; 17,903                                                                                                                                  | 17,867                       | 17,902                                                                                                  | 17,877; 17,879;<br>17,884; 17,887;<br>17,891                            | 17,904            |
|                   | Durum wheat | 43      | 17,862; 17,874; 17,875; 17,882; 17,886;<br>17,889; 17,892; 17,894; 17,895; 17,896;<br>17,897; 17,898; 17,899; 17,901; 17,905;<br>17,907; 17,908; 17,909; 17,910; 17,912 | 17,857,<br>17,860,<br>17,883 | 17,858; 17,865; 17,868;<br>17,872; 17,873; 17,878;<br>17,885; 17,888; 17,893;<br>17,900; 17,906; 17,911 | 17,859; 17,861,<br>17,863; 17,864,<br>17,866; 17,869,<br>17,870; 17,871 |                   |
| 2014              | Soft wheat  | 16      | 17,913; 17,915; 17,929; 17,930; 17,932;<br>17,933; 17,934; 17,938; 17,940; 17,942                                                                                       |                              | 17,914; 17,939                                                                                          | 17,916; 17,935                                                          | 17,931;<br>17,936 |
|                   | Durum wheat | 16      | 17,917; 17,918; 17,920; 17,923; 17,924;<br>17,926; 17,928; 17,937; 17,943; 17,944                                                                                       | 17,921,<br>17,922,<br>17,927 | 17,919; 17,925                                                                                          | 17,941                                                                  |                   |
| 2015              | Soft wheat  | 20      | 17,945; 17,950; 17,952; 17,953; 17,954;<br>17,956; 17,958; 17,961; 17,962; 17,963;<br>17,964; 17,965; 17,967                                                            | 17,959,<br>17,969            |                                                                                                         | 17,966; 17,955,<br>17,968; 17,957,<br>17,946                            |                   |
|                   | Durum wheat | 8       | 17,960; 17,972                                                                                                                                                          | 17,971                       | 17,947; 17,948; 17,949;<br>17,951                                                                       | 17,970                                                                  |                   |
| 2016              | Soft wheat  | 15      | 17,973; 17,975; 17,978; 17,979; 17,983;<br>17,984; 17,987; 17,989                                                                                                       | 17,982                       | 17,977; 17,981                                                                                          | 17,974; 17,976,<br>17,980; 17,988                                       |                   |
|                   | Durum wheat | 3       | 17,985; 17,986                                                                                                                                                          |                              | 17,990                                                                                                  |                                                                         |                   |
| Total             |             | 134     | 70                                                                                                                                                                      | 11                           | 24                                                                                                      | 26                                                                      | 3                 |
